# Supplementary material for: In vivo fluorescence bioimaging of ascorbic acid in mice: Development of an efficient probe consisting of phthalocyanine, TEMPO, and albumin
Source: PubMed Central journal article supplement (PMC5784034; doi:10.1038/s41598-018-19762-8), 2018-01-24
Supplement: 41598_2018_19762_MOESM1_ESM.pdf [file 41598_2018_19762_MOESM1_ESM.pdf]

## Supplementary Information

*In vivo* fluorescence bioimaging of ascorbic acid in mice:  
Development of an efficient probe consisting of  
phthalocyanine, TEMPO, and albumin

Takanori Yokoi,<sup>1</sup> Takayuki Otani,<sup>2</sup> Kazuyuki Ishii<sup>1\*</sup>

<sup>1</sup>*Institute of Industrial Science, The University of Tokyo, 4-6-1 Komaba Meguro-ku, Tokyo 153-8505, Japan.* <sup>2</sup>*Katayama Chemical Industries, Co., Ltd., 4-1-7 Ina, Minoh city, Osaka 562-0015, Japan*

Corresponding author. E-mail: k-ishii@iis.u-tokyo.ac.jp

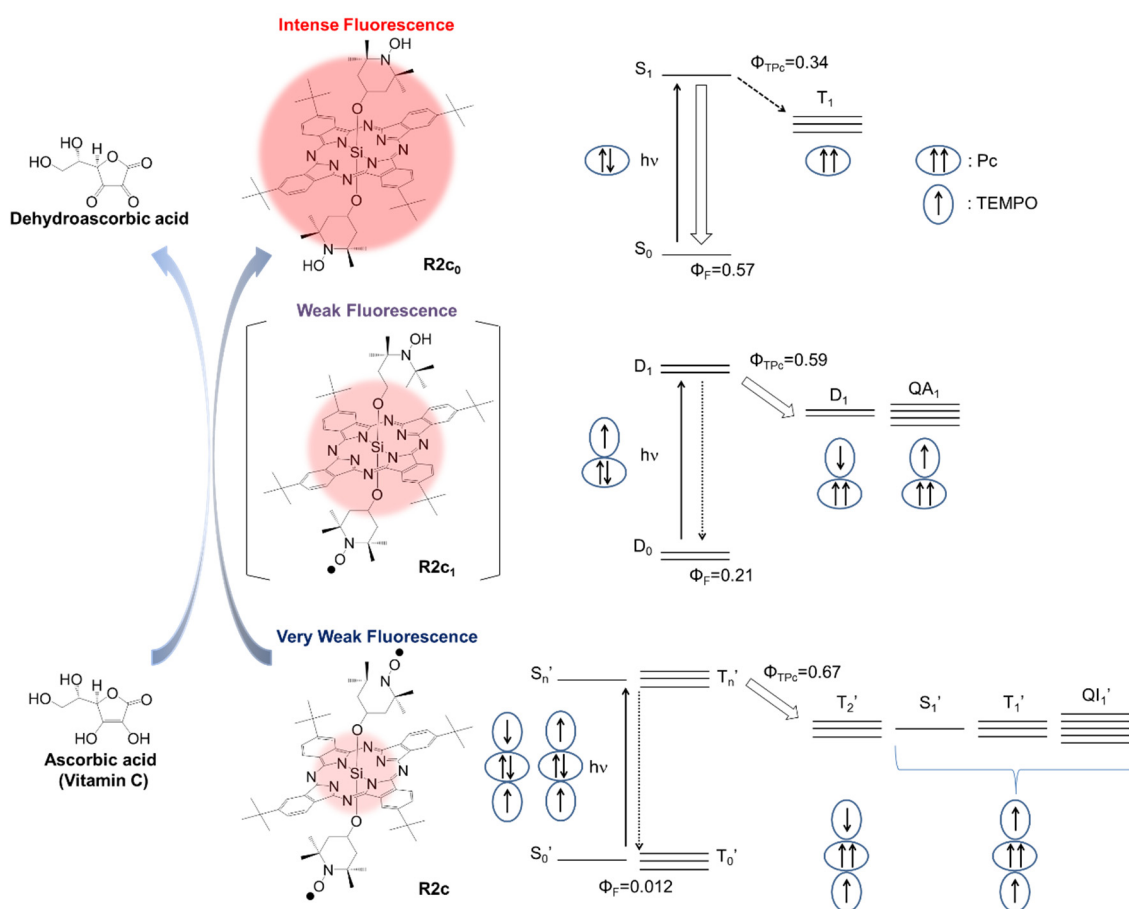

**Supplementary Figure S1. Excited-state dynamics of silicon phthalocyanine (SiPc) derivatives, quenching of SiPc fluorescence due to TEMPO radicals, and reaction between R2c and ascorbic acid.**

Illustrated are the excited-state properties of (dihydroxy)SiPc (R0), which are fundamentally similar to those of R2c<sub>0</sub>, the two-electron reduced form of R2c. Ascorbic acid exists as an ascorbate anion when pH is >4.2. The lowest excited singlet (S<sub>1</sub>) and triplet (T<sub>1</sub>) states, located at ~14500 cm<sup>-1</sup> and ~9000 cm<sup>-1</sup>, are nearly derived from the <sup>1</sup>(a<sub>1u</sub>e<sub>g</sub>) and <sup>3</sup>(a<sub>1u</sub>e<sub>g</sub>) configurations, respectively, with the a<sub>1u</sub> (π) and e<sub>g</sub> (π\*) orbitals denoting the HOMO and LUMO of SiPc. The fluorescence (Φ<sub>F</sub>) and triplet (Φ<sub>TPc</sub>) quantum yields are 0.57 and 0.34, respectively<sup>1-3</sup>. In R2c<sub>1</sub>, the one-electron reduced form of R2c, the doublet ground (D<sub>0</sub>) state and the excited doublet (D<sub>n</sub>) state consist of TEMPO in the D<sub>0</sub> state (<sup>2</sup>TEMPO) and SiPc in the singlet (S<sub>0</sub> or S<sub>1</sub>) state (<sup>1</sup>SiPc or <sup>1</sup>SiPc\*). On the other hand, the lowest excited doublet (D<sub>1</sub>) and quartet (QA<sub>1</sub>) states are generated by the interaction between <sup>2</sup>TEMPO and SiPc in the T<sub>1</sub> state (<sup>3</sup>SiPc\*). Studies of SiPc linked to one TEMPO radical (R1c) indicated that generation of the D<sub>n</sub>→D<sub>1</sub> transition enhanced the <sup>1</sup>SiPc\*→<sup>3</sup>SiPc\* intersystem crossing (Φ<sub>TPc</sub> = 0.59), and decreased the Φ<sub>F</sub> value to 0.21<sup>1-3</sup>. In R2c, the singlet (S<sub>0</sub>') and triplet (T<sub>0</sub>') ground states are generated by the

interaction between two  $^2\text{TEMPO}$  radicals. The excited singlet ( $S_n'$ ) and triplet ( $T_n'$ ) states are derived from  $^1\text{SiPc}^*$  and two  $^2\text{TEMPO}$  radicals. The interactions between  $^3\text{SiPc}^*$  and the two  $^2\text{TEMPO}$  radicals result in the lowest excited singlet ( $S_1'$ ), triplet ( $T_1'$ ), and quintet ( $Q_1'$ ) states, as well as the second lowest excited triplet ( $T_2'$ ) state. Here, the two  $^2\text{TEMPO}$  radicals exhibit triplet and singlet characters in the  $T_1'$  and  $T_2'$  states, respectively. As a result of interactions with the two  $^2\text{TEMPO}$  radicals, the  $\Phi_F$  value significantly decreased to 0.012, because  $^3\text{SiPc}^*$  ( $\Phi_{\text{TPc}} = 0.67$ ) was preferably formed<sup>1-3</sup>.

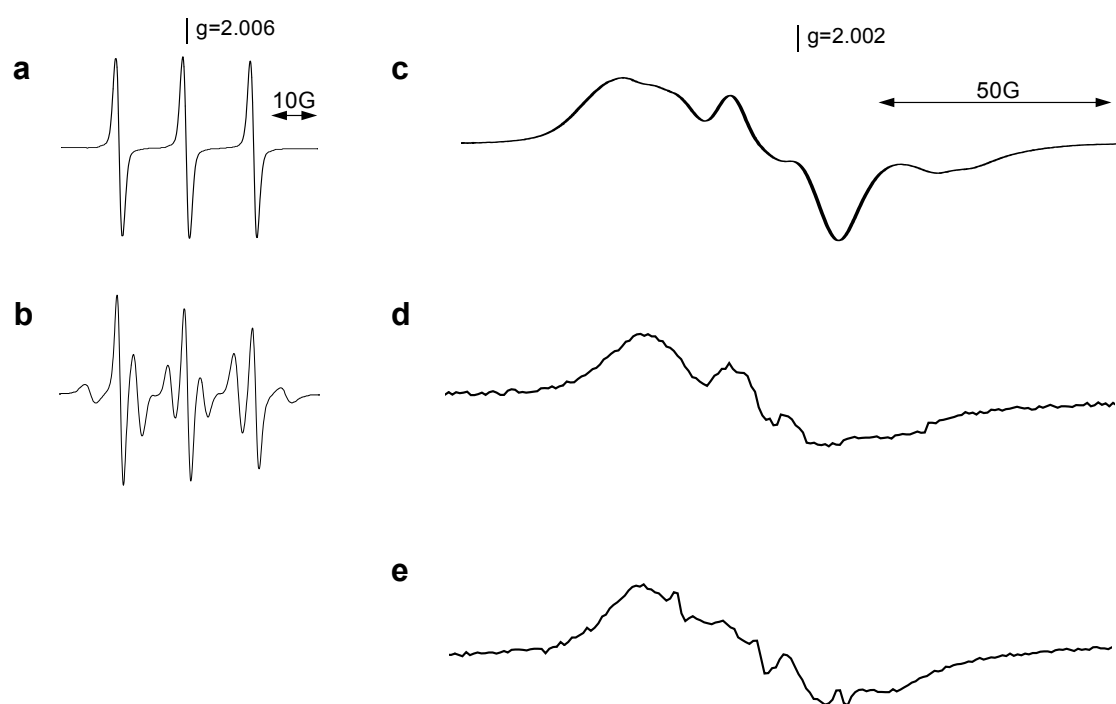

**Supplementary Figure S2. Electron spin resonance spectra.**

Steady-state electron spin resonance spectra of 4-hydroxy-TEMPO in toluene (a), R2c in toluene (b), R2c in frozen toluene (c), R2c@(BSA)<sub>2</sub> in aqueous solution (d), and R2c@TX-100 in aqueous solution (e).

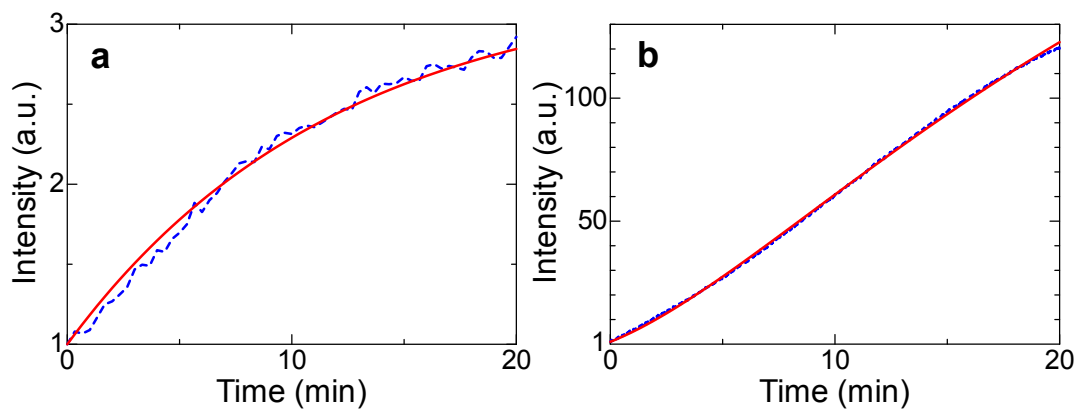

**Supplementary Figure S3. Analyses of time courses of fluorescence from liposomal R2c and R2c@(BSA)<sub>2</sub>.**

Time courses (blue dashed lines) of fluorescence from liposomal R2c (a) and R2c@(BSA)<sub>2</sub> (b) in aqueous solutions at pH 7.4, which can be analysed, respectively, by a single exponential function (a, red line), and as a function based on consecutive reaction (b, red line).

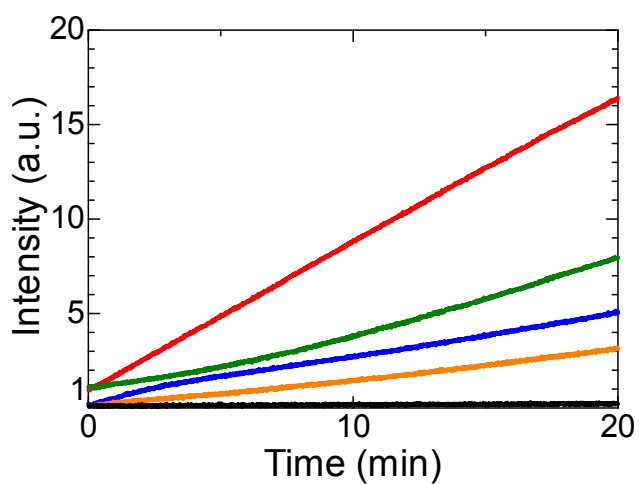

**Supplementary Figure S4. pH dependence of fluorescence.**

Time courses of R2c@(BSA)<sub>2</sub> fluorescence at pH 2 (green), pH 3 (red), pH 4 (blue), pH 5 (orange), and pH 6 (black): the differences between pH 6, 7, and 8 were negligible. Accordingly, pH 3 is the best condition at which to measure R2c@(BSA)<sub>2</sub> fluorescence due to ascorbic acid.

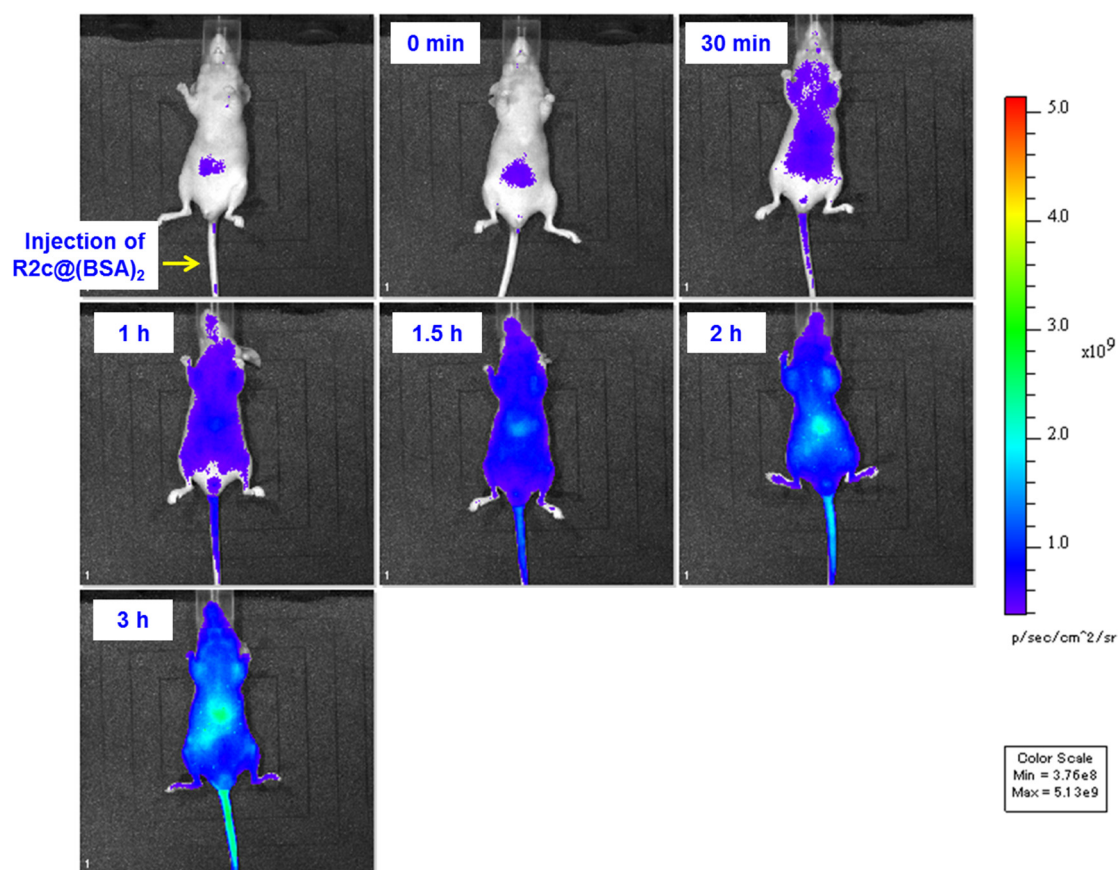

**Supplementary Figure S5. Fluorescence imaging of a mouse injected with R2c@(BSA)<sub>2</sub>.**

Representative *in vivo* fluorescence imaging of a mouse injected with R2c@(BSA)<sub>2</sub>, but not with ascorbic acid. Eventually, fluorescence due to R2c@(BSA)<sub>2</sub> was observed throughout the body.

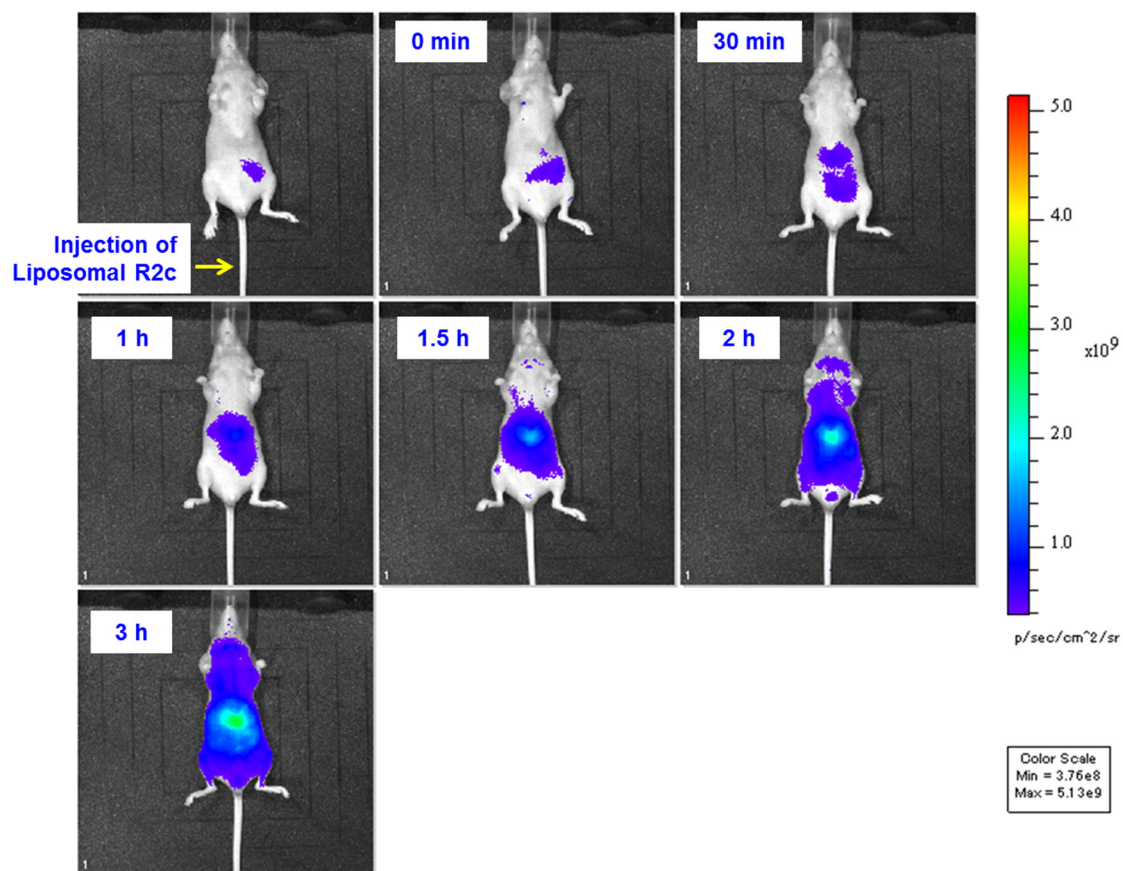

**Supplementary Figure S6. Fluorescence imaging of a mouse injected with liposomal R2c.**

Representative *in vivo* imaging of a mouse injected with liposomal R2c, but not with ascorbic acid. At the end of experiment, fluorescence was observed throughout the body, but was particularly intense in the liver.



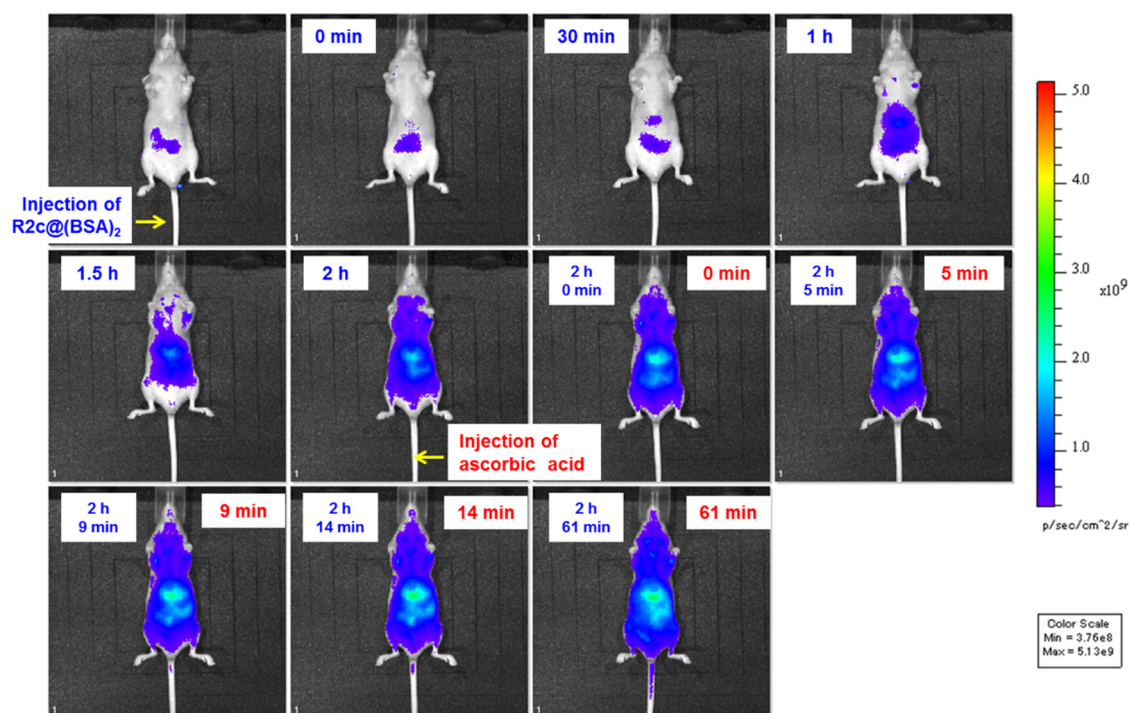

**Supplementary Figure S7. Fluorescence imaging of a mouse injected with liposomal R2c and ascorbic acid.**

Representative *in vivo* liposomal R2c-based fluorescence imaging of intravenously injected ascorbic acid in a mouse. Time elapsed after R2c@(BSA)<sub>2</sub> injection is indicated at the upper left in each image, while that after ascorbic acid injection is shown at the upper right in each image.

### Supplementary References

1. Ishii, K., Kubo, K., Sakurada, T., Komori, K. & Sakai, Y. Pthalocyanine-based fluorescence probes for detecting ascorbic acid: phthalocyaninosilicon covalently linked to TEMPO radicals. *Chem. Commun.* **47**, 4932-4934 (2011).
2. Ishii, K., Hirose, Y., Fujitsuka, H., Ito, O. & Kobayashi, N. Time-resolved EPR, fluorescence, and transient absorption studies on phthalocyaninosilicon covalently linked to one or two TEMPO radicals. *J. Am. Chem. Soc.* **123**, 702-708 (2001).
3. Ishii, K., Takeuchi, S., Shimizu, S. & Kobayashi, N. A concept for controlling singlet oxygen ( $^1\Delta_g$ ) yields using nitroxide radicals: phthalocyaninosilicon covalently linked to nitroxide radicals. *J. Am. Chem. Soc.* **126**, 2082-2088 (2004).
